# Supplementary material
Source: MDPI journal article supplement (https://www.mdpi.com/2221-3759/10/2/17)
Supplement: s1 [file s1]

## Genetic interaction of *Thm2* and *Thm1* shapes postnatal craniofacial bone

Erin E Bumann et al.,

**Supplemental Table S1.** All Measurements with their Corresponding Significance

| Measurement                              | significant as raw measurement | significant relative to centroid size | Type                    |
|------------------------------------------|--------------------------------|---------------------------------------|-------------------------|
| <b>Cranium Centroid Size</b>             | yes                            | -                                     | <b>Size</b>             |
| <b>Mandibular Centroid Size</b>          | yes                            | -                                     |                         |
| <b>Snout angle</b>                       | yes                            | -                                     |                         |
| <i>Mid-anterior cranial vault angle</i>  | no                             | -                                     | <b>Angle</b>            |
| <i>Mid-posterior cranial vault angle</i> | no                             | -                                     |                         |
| <i>Anterior cranial vault angle</i>      | no                             | -                                     |                         |
| <i>Facial angle</i>                      | no                             | -                                     |                         |
| <i>Palate arch angle</i>                 | no                             | -                                     |                         |
| <b>Premaxilla length</b>                 | yes                            | yes                                   | <b>Antero-Posterior</b> |
| <b>Nasal length</b>                      | yes                            | yes                                   |                         |
| <b>Facial region length</b>              | yes                            | yes                                   |                         |
| <b>Mandibular length (superior)</b>      | yes                            | yes                                   |                         |
| <b>Mandibular length (inferior)</b>      | yes                            | yes                                   |                         |
| <b>Upper jaw length</b>                  | yes                            | yes                                   |                         |
| <b>Maxilla length</b>                    | yes                            | no - $p < 0.057$                      |                         |
| <b>Zygomatic length</b>                  | yes                            | no                                    |                         |
| <i>Anterior cranial base length</i>      | no                             | no                                    |                         |
| <i>Basisphenod length</i>                | no                             | no                                    |                         |
| <i>Presphenoid length</i>                | no                             | no                                    |                         |
| <i>Palate length</i>                     | no                             | no                                    |                         |
| <b>Palatal width</b>                     | no                             | yes                                   | <b>Transverse</b>       |
| <b>Inter-zygomatic arch width</b>        | yes                            | no - $p < 0.053$                      |                         |
| <b>Inter-orbital width</b>               | yes                            | no                                    |                         |
| <b>Anterior nasal width</b>              | yes                            | no                                    |                         |
| <b>Inter-maxillary width</b>             | yes                            | no                                    |                         |
| <b>Inter-(1st)molar width</b>            | yes                            | no                                    |                         |
| <i>Basisphenoid (rostral) width</i>      | no                             | no                                    |                         |
| <i>Inter-zygomatic root width</i>        | no                             | no                                    |                         |
| <i>Anterior cranial vault width</i>      | no                             | no                                    |                         |
| <i>Inferior frontal arch width</i>       | no                             | no                                    |                         |
| <b>Mandibular posterior height</b>       | yes                            | no                                    | <b>Vertical</b>         |
| <b>Ear height</b>                        | yes                            | no                                    |                         |
| <b>Facial height</b>                     | yes                            | no                                    |                         |
| <i>Posterior nasal height</i>            | no                             | no                                    |                         |
| <i>Anterior pharyngeal height</i>        | no                             | no                                    |                         |
| <i>Anterior cranial vault height</i>     | no                             | no                                    |                         |
| <i>Frontal crest height</i>              | no                             | no                                    |                         |
| <i>Palate height</i>                     | no                             | no                                    |                         |

*Measurements not shown*

**Supplemental Table S2.** Euclidean and Projected Landmarks

| Landmark Descriptions                                                                      | Measurement type | Type   |
|--------------------------------------------------------------------------------------------|------------------|--------|
| Midpoint mesial to maxillary incisors                                                      | Euclidean        | Single |
| Anterior point at base of nasal aperture                                                   | Euclidean        | Single |
| Nasion                                                                                     | Euclidean        | Single |
| Bregma                                                                                     | Euclidean        | Single |
| Lambda                                                                                     | Euclidean        | Single |
| Mid-sagittal point of intersection of interparietal and occipital bones                    | Euclidean        | Single |
| Medial premaxillary - maxillary junction                                                   | Euclidean        | Single |
| Midline point on maxillary-palatal suture                                                  | Euclidean        | Single |
| Posterior point on palate                                                                  | Euclidean        | Single |
| Anterior point on midline of presphenoid (junction with ethmoid)                           | Euclidean        | Single |
| Intersphenoidal synchondrosis (mid-point of endocranial rostral margin of basisphenoid)    | Euclidean        | Single |
| Spine of ethmoidal crest                                                                   | Euclidean        | Single |
| Mid-point on interior crest of frontal bone                                                | Euclidean        | Single |
| Posterior inferior point on mandibular condyle                                             | Euclidean        | Single |
| Posterior tip of the angular process                                                       | Euclidean        | Single |
| Anterior inferior most point on the body of the mandible                                   | Euclidean        | Single |
| Midpoint on alveolar bone lingual to the mandibular incisor                                | Euclidean        | Single |
| Highest point at the top of the palate                                                     | Euclidean        | Single |
| Anterior point on intersection of premaxillary and nasal bones                             | Euclidean        | Paired |
| Intersection of maxilla, frontal and lacrimal bones                                        | Euclidean        | Paired |
| Anterior-superior point on zygomatic process of maxilla (lateral to infra orbital fissure) | Euclidean        | Paired |
| Anterior end of zygomatic bone                                                             | Euclidean        | Paired |
| Posterior end of zygomatic bone                                                            | Euclidean        | Paired |
| Anterior point on base of zygomatic process of temporal bone                               | Euclidean        | Paired |
| Posterior point on base of zygomatic process of temporal bone                              | Euclidean        | Paired |
| Most prominent lateral point on frontal-parietal suture                                    | Euclidean        | Paired |
| Superior point on interior margin of external auditory meatus                              | Euclidean        | Paired |
| Inferior point on interior margin of external auditory meatus                              | Euclidean        | Paired |
| Lateral premaxillary - maxillary suture                                                    | Euclidean        | Paired |
| Anterior point on palatine foramen                                                         | Euclidean        | Paired |
| Crest of alveolar process (mesial to 1st molar)                                            | Euclidean        | Paired |
| Crest of alveolar process (distal to 3rd molar)                                            | Euclidean        | Paired |
| Posterior point on pterygoid process                                                       | Euclidean        | Paired |
| Lateral point of endocranial rostral margin of basisphenoid                                | Euclidean        | Paired |
| Superior-lateral point on interior crest of frontal bone                                   | Euclidean        | Paired |
| Midpoint mesial to maxillary incisors                                                      | Projected        | Single |
| Spine of ethmoidal crest                                                                   | Projected        | Single |
| Anterior point on midline of presphenoid (junction with ethmoid)                           | Projected        | Single |
| Spheno-occipital synchondrosis (mid-point of endocranial caudal margin of basisphenoid)    | Projected        | Single |
| Intersphenoidal synchondrosis (mid-point of endocranial rostral margin of basisphenoid)    | Projected        | Single |
| Posterior point on palate                                                                  | Projected        | Single |
| Midline point on maxillary-palatal suture                                                  | Projected        | Single |
| Nasale                                                                                     | Projected        | Single |
| Nasion                                                                                     | Projected        | Single |
| Highest point at the top of the skull                                                      | Projected        | Single |
| Highest point at the top of the palate                                                     | Projected        | Single |
| Lateral premaxillary - maxillary suture                                                    | Projected        | Paired |
| Anterior end of zygomatic bone                                                             | Projected        | Paired |
| Posterior end of zygomatic bone                                                            | Projected        | Paired |

|                                                               |           |        |
|---------------------------------------------------------------|-----------|--------|
| Anterior point on base of zygomatic process of temporal bone  | Projected | Paired |
| Posterior point on base of zygomatic process of temporal bone | Projected | Paired |
| Superior point on interior margin of external auditory meatus | Projected | Paired |
| Inferior point on interior margin of external auditory meatus | Projected | Paired |
| Crest of alveolar process (mesial to 1st molar)               | Projected | Paired |
| Crest of alveolar process (distal to 3rd molar)               | Projected | Paired |
